# Supplementary material
Source: PubMed Central journal article supplement (PMC3933628)
Supplement: 11693_2013_9127_MOESM1_ESM.pdf [file 11693_2013_9127_MOESM1_ESM.pdf]

**TITLE: EVOLUTION OF TRYPTOPHAN BIOSYNTHETIC PATHWAY IN MICROBIAL GENOMES: A COMPARATIVE GENETIC STUDY**

Journal: Systems and Synthetic Biology

AUTHORS: PRIYA V K<sup>1</sup>, SUSMITA SARKAR<sup>1</sup> AND SOMDATTA SINHA<sup>2</sup>

AFFILIATION: <sup>1</sup> Csir-Centre For Cellular And Molecular Biology, Uppal Road, Hyderabad, India.

<sup>2</sup> Indian Institute Of Science Education & Research Mohali, Punjab, India

Email: [ssinha@iisermohali.ac.in](mailto:ssinha@iisermohali.ac.in); [somdattasinha@gmail.com](mailto:somdattasinha@gmail.com)

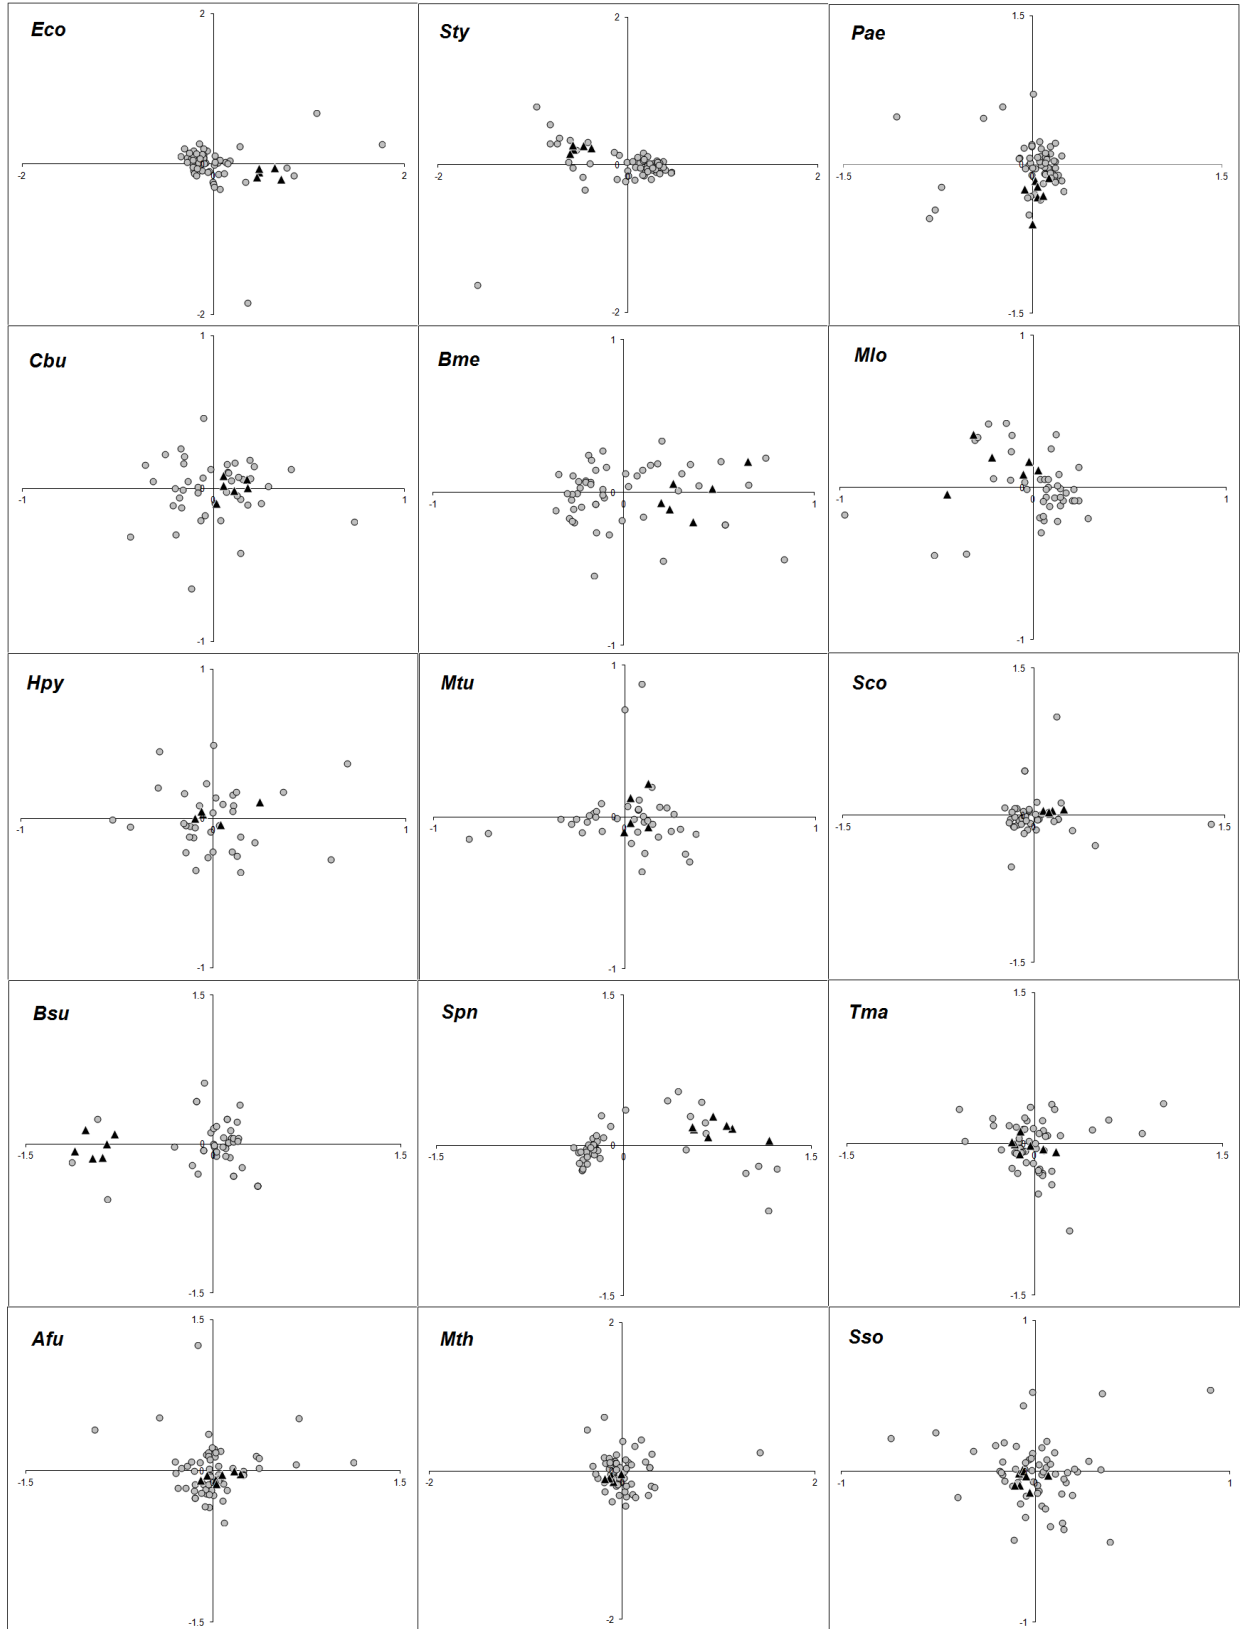

**Fig S1.1.** Correspondence analysis of the RSCU values of the genes present in the Tryptophan pathway (black triangles) compared to the Highly Expressed Ribosomal genes (grey circles).
