# Supplementary material
Source: PubMed Central journal article supplement (PMC3933628)
Supplement: 11693_2013_9127_MOESM2_ESM.pdf [file 11693_2013_9127_MOESM2_ESM.pdf]

**TITLE: EVOLUTION OF TRYPTOPHAN BIOSYNTHETIC PATHWAY IN MICROBIAL GENOMES: A COMPARATIVE GENETIC STUDY**

Journal: Systems and Synthetic Biology

AUTHORS: PRIYA V K<sup>1</sup>, SUSMITA SARKAR<sup>1</sup> AND SOMDATTA SINHA<sup>2</sup>

AFFILIATION: <sup>1</sup> Csir-Centre For Cellular And Molecular Biology, Uppal Road, Hyderabad, India.

<sup>2</sup> Indian Institute Of Science Education & Research Mohali, Punjab, India

Email: [ssinha@iisermohali.ac.in](mailto:ssinha@iisermohali.ac.in); [somdattasinha@gmail.com](mailto:somdattasinha@gmail.com)

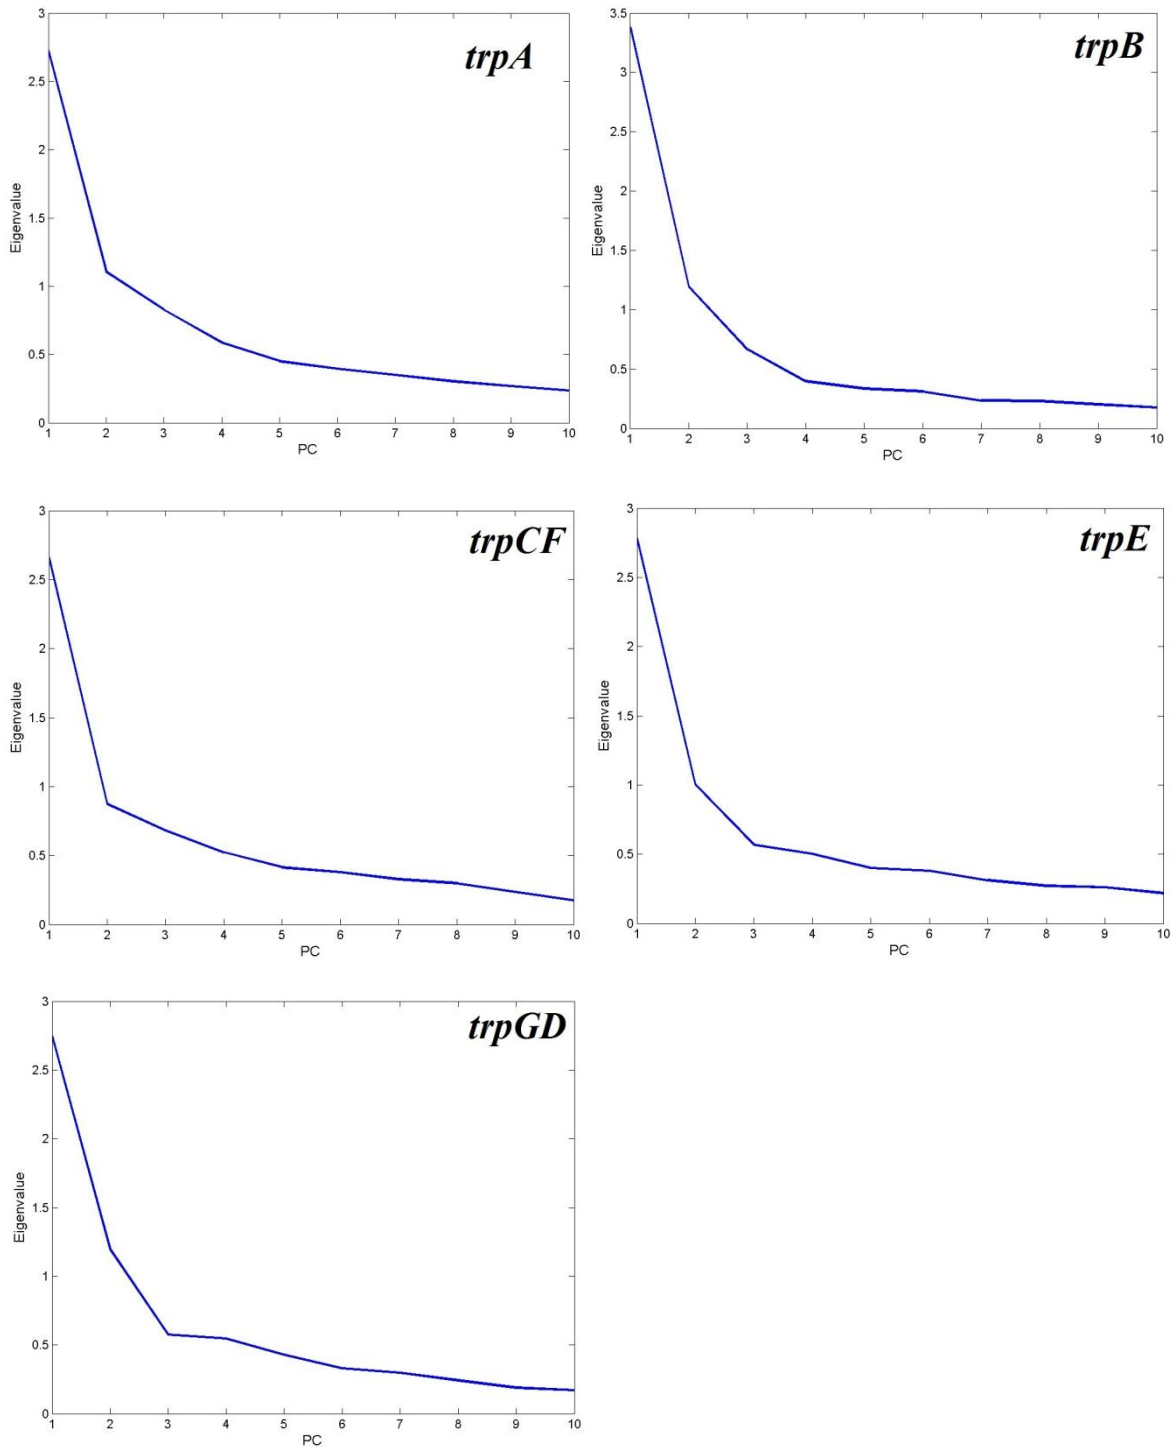

**Fig 1.** Scree plots of Principal Component Analysis of the normalized RSCU values of Tryptophan biosynthesis pathway genes

**Table S2.1:** Percentage variance explained

| <b>PC</b> | <b><i>trpA</i></b> | <b><i>trpB</i></b> | <b><i>trpCF</i></b> | <b><i>trpE</i></b> | <b><i>trpGD</i></b> |
|-----------|--------------------|--------------------|---------------------|--------------------|---------------------|
| 1         | 35.75              | 45.37              | 38.28               | 39.83              | 39.87               |
| 2         | 50.26              | 61.4               | 50.87               | 54.16              | 57.2                |
| 3         | 61.11              | 70.35              | 60.67               | 62.29              | 65.56               |
| 4         | 68.79              | 75.66              | 68.2                | 69.46              | 73.48               |
| 5         | 74.7               | 80.16              | 74.16               | 75.17              | 79.7                |
| 6         | 79.9               | 84.33              | 79.63               | 80.6               | 84.5                |
| 7         | 84.5               | 87.49              | 84.36               | 85.07              | 88.82               |
| 8         | 88.48              | 90.57              | 88.66               | 88.95              | 92.34               |
| 9         | 92                 | 93.28              | 92.08               | 92.68              | 95.09               |
| 10        | 95.11              | 95.64              | 94.61               | 95.81              | 97.58               |
| 11        | 96.89              | 97.4               | 96.4                | 97.41              | 98.87               |
| 12        | 98.48              | 98.51              | 98                  | 98.69              | 99.54               |
| 13        | 99.4               | 99.4               | 99.06               | 99.61              | 100                 |
| 14        | 100                | 100                | 100                 | 100                | 100                 |

**Table S2.2:** Loadings of *trpA* on the first three PCs. Bold numbers show loadings > 0.2.

| <i>trpA</i> |            |                |                |                |            |            |                |                |                |
|-------------|------------|----------------|----------------|----------------|------------|------------|----------------|----------------|----------------|
|             |            | 1              | 2              | 3              |            |            | 1              | 2              | 3              |
| <b>Phe</b>  | <b>UUU</b> | <b>0.22213</b> | -0.1431        | 0.01677        | <b>Ala</b> | <b>GCU</b> | <b>0.21827</b> | 0.05967        | -0.0831        |
|             | <b>UUC</b> | -0.164         | 0.13497        | 0.1825         |            | <b>GCC</b> | -0.1505        | -0.0592        | 0.01339        |
| <b>Leu</b>  | <b>UUA</b> | 0.19206        | -0.1769        | -0.1186        |            | <b>GCA</b> | 0.11602        | -0.0181        | 0.18508        |
|             | <b>UUG</b> | 0.05697        | -0.0565        | 0.16603        | <b>GCG</b> | -0.0725    | -0.1454        | 0.13256        |                |
|             | <b>CUU</b> | 0.07019        | 0.07409        | 0.14199        | <b>Tyr</b> | <b>UAU</b> | 0.15464        | -0.1234        | -0.0118        |
|             | <b>CUC</b> | -0.0395        | 0.17104        | 0.1501         |            | <b>UAC</b> | -0.0838        | 0.05901        | 0.13511        |
|             | <b>CUA</b> | 0.05131        | 0.00618        | -0.0393        | <b>His</b> | <b>CAU</b> | 0.00682        | -0.0815        | <b>0.41502</b> |
|             | <b>CUG</b> | -0.1737        | 0.04005        | <b>0.21164</b> |            | <b>CAC</b> | -0.0016        | -0.0396        | <b>-0.3702</b> |
| <b>Ile</b>  | <b>AUU</b> | 0.18067        | <b>-0.2225</b> | 0.08065        | <b>Gln</b> | <b>CAA</b> | 0.16916        | <b>-0.2517</b> | -0.049         |
|             | <b>AUC</b> | -0.1171        | -0.012         | -0.0238        |            | <b>CAG</b> | -0.1275        | 0.10507        | 0.17366        |
|             | <b>AUA</b> | 0.14585        | <b>0.28193</b> | 0.0205         | <b>Asn</b> | <b>AAU</b> | 0.13515        | <b>-0.2522</b> | 0.02798        |
| <b>Val</b>  | <b>GUU</b> | <b>0.22496</b> | 0.03465        | 0.08734        |            | <b>AAC</b> | -0.1304        | 0.06982        | 0.04603        |
|             | <b>GUC</b> | -0.07          | -0.0667        | -0.0617        | <b>Lys</b> | <b>AAA</b> | <b>0.21101</b> | -0.0131        | 0.08604        |
|             | <b>GUA</b> | 0.1529         | -0.0292        | -0.0007        |            | <b>AAG</b> | -0.1492        | 0.11573        | 0.01259        |
|             | <b>GUG</b> | -0.0102        | 0.03352        | 0.10226        | <b>Asp</b> | <b>GAU</b> | 0.13783        | -0.0584        | 0.17943        |
| <b>Ser</b>  | <b>UCU</b> | 0.11034        | -0.1416        | 0.09229        |            | <b>GAC</b> | -0.1148        | -0.0375        | 0.04034        |
|             | <b>UCC</b> | -0.15          | -0.0041        | 0.14716        | <b>Glu</b> | <b>GAA</b> | 0.06869        | -0.1571        | -0.0146        |
|             | <b>UCA</b> | 0.14866        | -0.0089        | 0.16808        |            | <b>GAG</b> | -0.0236        | 0.17352        | 0.13088        |
|             | <b>UCG</b> | -0.1288        | -0.181         | -0.006         | <b>Cys</b> | <b>UGU</b> | 0.01401        | -0.1436        | <b>0.28956</b> |
|             | <b>AGU</b> | 0.11594        | 0.02065        | -0.0257        |            | <b>UGC</b> | -0.1657        | -0.0288        | -0.0724        |
|             | <b>AGC</b> | -0.0114        | 0.04598        | -0.1703        | <b>Arg</b> | <b>CGU</b> | 0.04393        | <b>-0.2217</b> | 0.06041        |
| <b>Pro</b>  | <b>CCU</b> | 0.16575        | -0.0631        | -0.0773        |            | <b>CGC</b> | -0.189         | <b>-0.212</b>  | 0.02631        |
|             | <b>CCC</b> | 0.07768        | 0.08558        | -0.1069        |            | <b>CGA</b> | 0.00624        | -0.0608        | -0.0051        |
|             | <b>CCA</b> | 0.15199        | 0.11107        | 0.11047        |            | <b>CGG</b> | -0.0183        | -0.0436        | 0.17306        |
|             | <b>CCG</b> | -0.1615        | -0.0789        | 0.12147        |            | <b>AGA</b> | 0.14971        | 0.06334        | -0.0523        |
| <b>Thr</b>  | <b>ACU</b> | 0.12784        | 0.07075        | 0.0645         |            | <b>AGG</b> | 0.13245        | <b>0.33138</b> | -0.0634        |
|             | <b>ACC</b> | -0.127         | -0.1484        | -0.0495        | <b>Gly</b> | <b>GGU</b> | 0.18545        | 0.02791        | 0.13921        |
|             | <b>ACA</b> | 0.10641        | 0.16667        | 0.09811        |            | <b>GGC</b> | -0.1033        | -0.1414        | -0.0763        |
|             | <b>ACG</b> | -0.0125        | <b>-0.2064</b> | 0.11789        |            | <b>GGA</b> | 0.16746        | 0.16491        | 0.03953        |
|             |            |                |                | <b>GGG</b>     |            | 0.03216    | 0.12863        | 0.07755        |                |
